# Supplementary material
Source: ML conference proceedings conference paper supplement (https://openaccess.thecvf.com/content/WACV2025/html/Shukla_Guardian_of_the_WACV_2025_paper.html)
Supplement: Supplementary file 1 [file Shukla_Guardian_of_the_WACV_2025_supplemental.pdf]

## A. White-box Adversary Evaluation

The attacker has complete access to the model parameters. Under such a white-box scenario, we craft AE from the target ensemble itself. We randomly select 1000 test samples and evaluate white-box attacks for all ensembles across a wide range of attack strength  $\epsilon$ . We present the results for CIFAR-10 with Resnet20 model in Fig. 1. We observe that for lower perturbations  $ENS_{PARL}$  performs similar to DVERGE whereas from 0.03 onwards PARL performs better than the previous defenses. Though PARL’s robustness against white-box attacks is still quite low, and it is a limitation which we plan to improve in our future works.

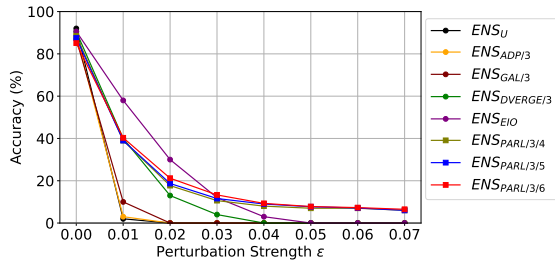

Figure 1. Resnet20 Ensemble classification accuracy (%) vs. Attack Strength ( $\epsilon$ ) against white-box attacks for CIFAR-10

## B. Evaluation on VGG 16 and LeNet-5

In the main paper, we presented results for PARL using ResNet models. To showcase its generalizability across other standard CNN architectures, including VGG16 and smaller models like LeNet-5 with only two convolutional layers, we applied PARL to these models. The results are displayed in Fig. 2a and Fig. 2b respectively. For VGG16 we applied PARL to first 5 and 6 layers obtain a much higher robust accuracy compared to baseline with clean accuracy of 86.79% and 82% respectively. For LeNet-5, with only 2 convolutional layers we apply PARL to first convolution and then both the convolution layers. We still observe a higher robust accuracy compared to baseline with clean accuracy of 71.67% and 63.52% respectively.

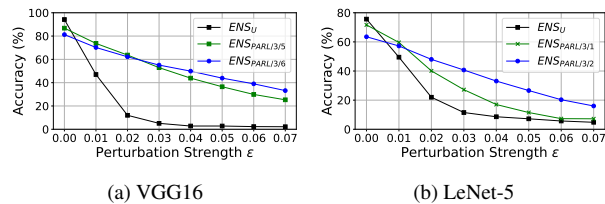

Figure 2. Ensemble classification accuracy (%) vs. Attack Strength ( $\epsilon$ ) for CIFAR-10 with different architectures

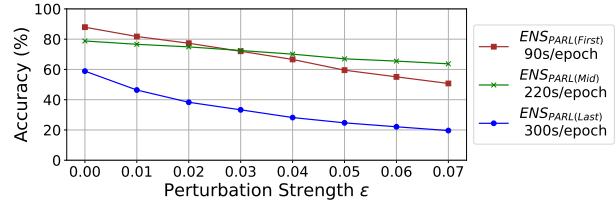

Figure 3. Resnet20  $ENS_{PARL/3/5}$  evaluation for CIFAR-10 with five layers selected from the start, middle, and end of the network

## C. Selection of initial, middle and last layers

In Fig. 3, we present the clean and robust accuracy for  $ENS_{PARL/3/5}$ , with five convolution layers selected from the beginning, middle, and end of the network. We also include the per-epoch training time for each model.  $ENS_{PARL(First)}$  achieves the highest clean accuracy, while  $ENS_{PARL(Mid)}$  excels in robust accuracy, though with a slight decrease in clean accuracy.  $ENS_{PARL(Last)}$  performs the worst in both clean and robust accuracy, likely because the final layers focus on converging the output, where introducing diversity is less effective. Overall,  $ENS_{PARL(First)}$  offers the best trade-off between clean and robust accuracy, with the lowest training time.
